# Supplementary material for: NLC-Based Sunscreen Formulations with Optimized Proportion of Encapsulated and Free Filters Exhibit Enhanced UVA and UVB Photoprotection
Source: MDPI journal article supplement (doi:10.3390/pharmaceutics16030427), 2024-03-20
Supplement: s1 [file s1]

## NLC-based sunscreen formulations with optimized proportion of encapsulated and free filters exhibit enhanced UVA and UVB photoprotection

Margarete M. de Araújo<sup>1†\*</sup>, Andressa C. Schneid<sup>1†</sup>, Mariana S. Oliveira<sup>2</sup>, Samuel V. Mussi<sup>1</sup>, Miller N. de Freitas<sup>3</sup>, Flávia C. Carvalho<sup>4</sup>, Edson A. Bernes Junior<sup>1</sup>, Renato Faro<sup>5</sup>, Hatylas Azevedo<sup>1</sup>

### 1. Cream Bases Composition

The SC-NLC formulation was added into three cream bases (CBs), which were labeled as CBI, CBII and CBIII. On the Table S1 the composition of these CBs is depicted.

Table S1. List of components found in the cream base I, II and III.

| Cream Base I                     | Cream Base II                    | Cream Base III                   |
|----------------------------------|----------------------------------|----------------------------------|
| Water                            | Water                            | Water                            |
| Ethylhexyl methoxycinnamate      | Aluminum Starch Octenylsuccinate | Ethylhexyl methoxycinnamate      |
| C12-15 alkyl benzoate            | Niacinamide                      | C12-15 alkyl benzoate            |
| Cyclodextrin                     | Ethylhexyl salicylate            | Aluminum starch octenylsuccinate |
| Methyl methacrylate crosspolymer | C12-15 alkyl benzoate            | Cyclopentasiloxane               |
| Potassium cetyl phosphate        | Homosalate                       | Glycerin                         |
| Glycerin                         | Pentylene glycol                 | Nylon-2                          |
| Stearyl Alcohol                  | Potassium cetyl phosphate        | Potassium cetyl phosphate        |
| Tribehenin PEG-20 esters         | Silica                           | Tribehenin PEG-20 esters         |
| Cetyl alcohol                    | Tapioca Starch                   | Cetearyl alcohol                 |
| Tocopheryl acetate               | Tribehenin PEG-20 esters         | Phenoxyethanol                   |
| VP/Eicosene Copolymer            | Caprylyl glycol                  | Caprylyl glycol                  |
| Phenoxyethanol                   | Hydroxypropyl starch phosphate   | Acrylates copolymer              |
| Triethanolamine                  | Decyl glucose                    | Hydrated silica                  |
| Caprylyl glycol                  | Ethylhexylglycerin               | Aluminum hydroxide               |

|                                                                                                                                                |                                                                                                                                                                                                                                                                                                                                                                                                                                                                                                                                                                                              |                                                                                                                                                                                                                                                                                                                                                                                                         |
|------------------------------------------------------------------------------------------------------------------------------------------------|----------------------------------------------------------------------------------------------------------------------------------------------------------------------------------------------------------------------------------------------------------------------------------------------------------------------------------------------------------------------------------------------------------------------------------------------------------------------------------------------------------------------------------------------------------------------------------------------|---------------------------------------------------------------------------------------------------------------------------------------------------------------------------------------------------------------------------------------------------------------------------------------------------------------------------------------------------------------------------------------------------------|
| Methylpropional<br>BHT                                                                                                                         | Xanthan gum<br>Tocopheryl acetate                                                                                                                                                                                                                                                                                                                                                                                                                                                                                                                                                            | Triethanolamine<br>Acrylates/C10-30 alkyl<br>acrylate crosspolymer                                                                                                                                                                                                                                                                                                                                      |
| Benzyl Salicylate<br>Hexyl cinnamal<br>Citronellol<br>Hydroxyethyl<br>methylthiopropenamide<br>Myristyl alcohol                                | VP/Eicosene copolymer<br>Steraryl alcohol<br>Talc<br>Methylpropanediol<br><br>Cetyl alcohol                                                                                                                                                                                                                                                                                                                                                                                                                                                                                                  | Decyl glucoside<br>Parfum<br>Alginic acid<br>Disodium EDTA<br><br>Butylphenyl<br>methylpropional                                                                                                                                                                                                                                                                                                        |
| Lauryl alcohol<br>Bis-ethylhexyloxyphenol<br>methoxyphenyl triazine<br>Diethylamino<br>hydroxybenzoyl hexyl<br>benzoate<br>Ethylhexyl triazone | Disodium EDTA<br>Aluminum hydroxide<br><br>Stearic acid<br><br>Sodium C14-16 oledin<br>sulfonate<br>Gossypium hirsutum<br>extract<br>Butylene glycol<br>Disodium phosphate<br>Propylene glycol<br>Phenoxyethanol<br>Arachidyl alcohol<br>Hydroxyethyl<br>methylthiopropenamide<br>Myristyl alcohol<br><br>Lauryl alcohol<br>Iron oxide<br><br>Titanium oxide<br>Ethylhexyl<br>methoxycinnamate<br>Bis-ethylhexyloxyphenol<br>methoxyphenyl triazine<br>Diethylamino<br>hydroxybenzoyl hexyl<br>benzoate<br>Ethylhexyl triazone<br>Methylene bis-<br>benzotriazolyl<br>tetramethylbutylphenol | Decarboxy carnosine HCl<br>Propylene glycol<br><br>Butylene glycol<br><br>Xanthan gum<br><br>Benzyl salicylate<br><br>PEG-12 dimethicone<br>Hexyl cinnamal<br>Citronellol<br>Iron oxide<br>Titanium oxide<br>Bis-ethylhexyloxyphenol<br>methoxyphenyl triazine<br>Diethylamino<br>hydroxybenzoyl hexyl<br>benzoate<br>Ethylhexyl triazone<br>Methylene bis-<br>benzotriazolyl<br>tetramethylbutylphenol |

## **2. Rheology**

The Figure SI1 shows the flow and viscosity curves of the mixtures composed by 80% of cream base (I, II and III) and 20% of water (blank) or 20% of SC-NLC. Also, Figure SI2 present the SC-NLC flow and viscosity curves.

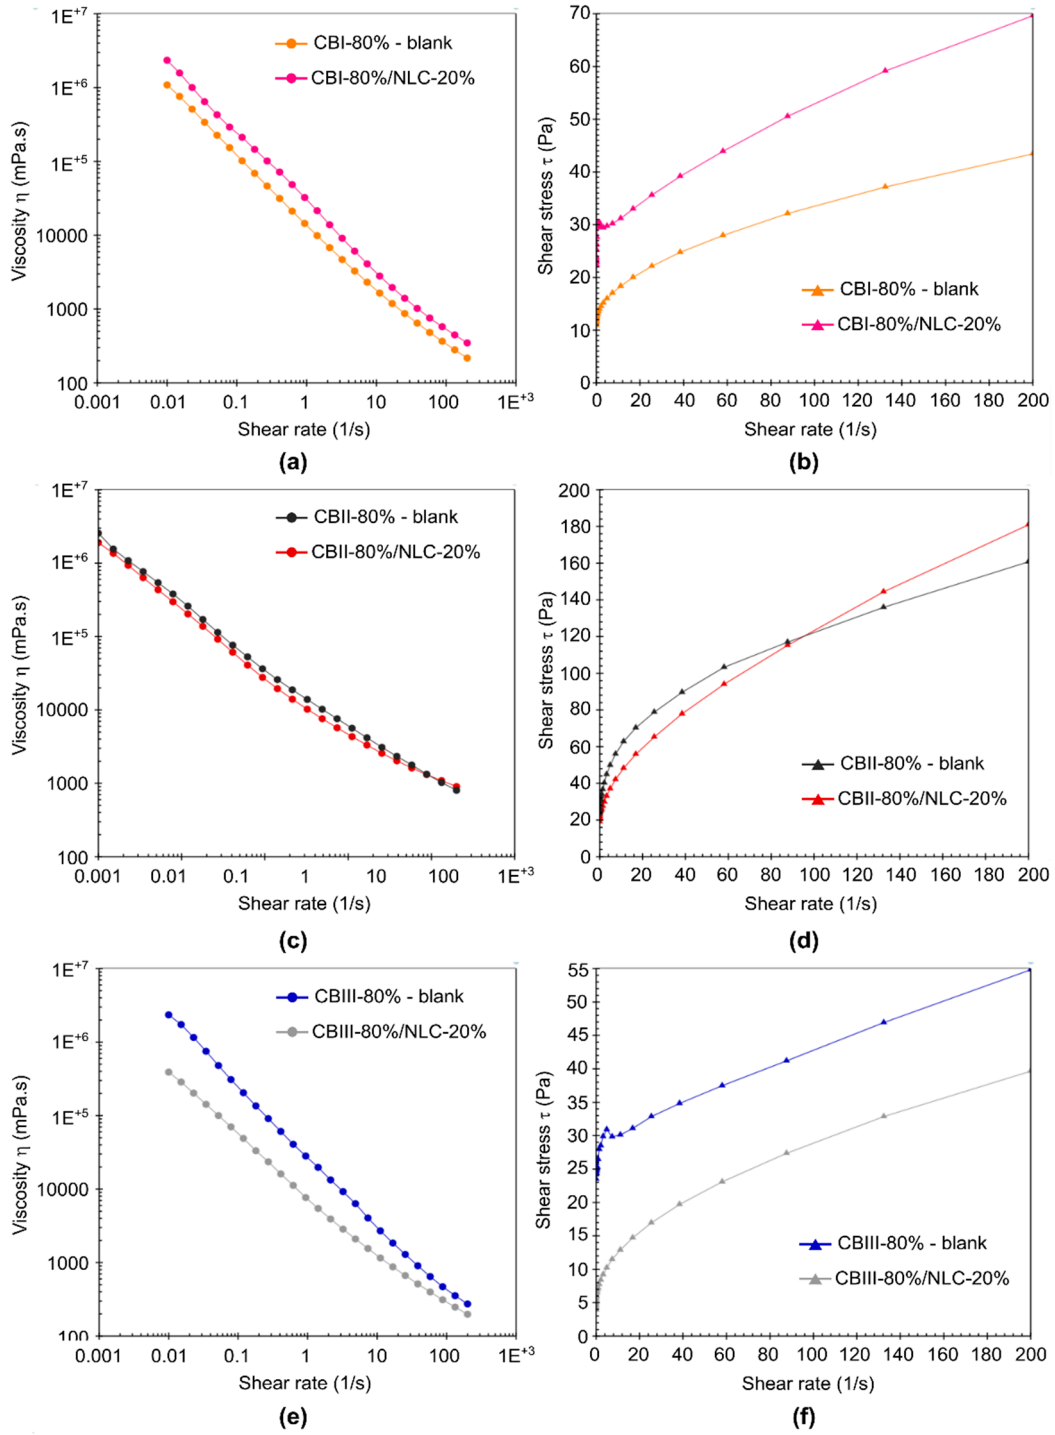

Figure S1. Viscosity (Viscosity vs Shear rate) and flow (Shear stress vs Shear rate) curves of (a - b) CBI-80% and 20% of water (blank) or 20 % of SC-NLC; (c - d) CBII-80% and 20% of water (blank) or 20 % of SC-NLC; (e - f) CBIII-80% and 20% of water (blank) or 20 % of SC-NLC.

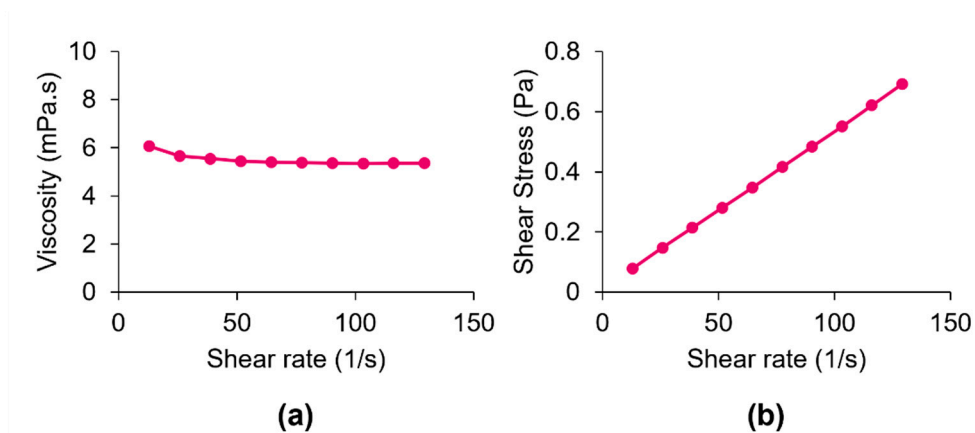

Figure S2. SC-NLC viscosity (a) and flow (b) curves, represented by viscosity vs shear rate and shear stress vs shear rate, respectively.

### 3. *In vivo* photoprotection

The FPS and UVA-PF data obtained for the three cream bases (I, II and III) containing 20% of SC-NLC or 20% of emulsion were evaluated based on the volunteers' skin phototype. This assay was performed aiming to better understand its impact on the products' photoprotection response. The results of this sub-analysis are shown in Figure S3.

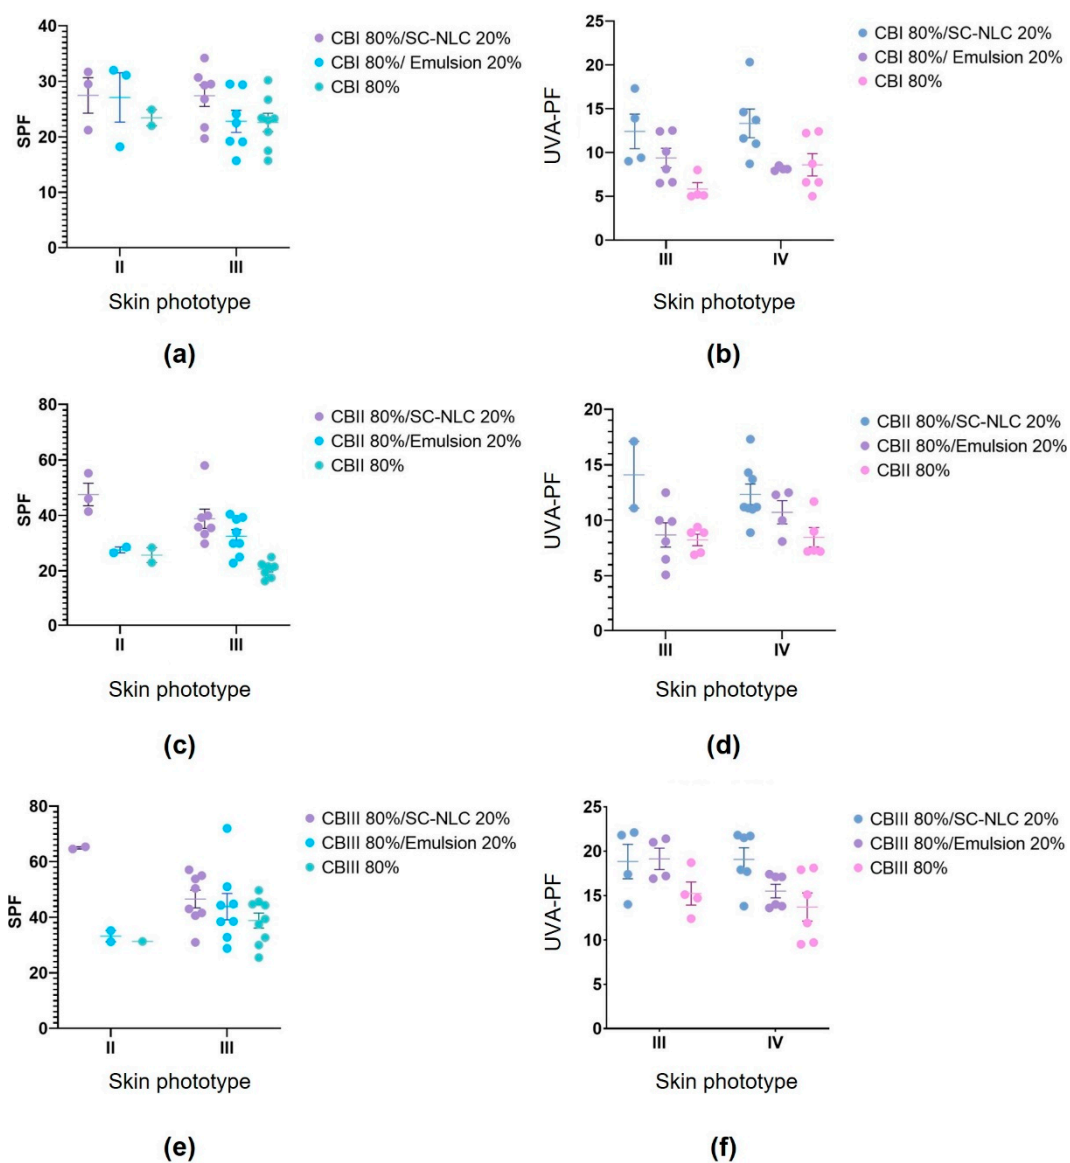

Figure S3. SPF and UVA-PF response, respectively, based on the volunteers phototype applying cream base (a-b) I; (c-d) II and (e-f) III, and their respective mixtures of 80% cream base + 20% of SC-NLC or 20% of emulsion.
